# Supplementary material for: Defining metrics for whole-genome sequence analysis of MRSA in clinical practice
Source: PubMed Central journal article supplement (PMC7276698; doi:10.1099/mgen.0.000354), 2020-03-31
Supplement: mgen-6-354-s001.pdf [file mgen-6-354-s001.pdf]

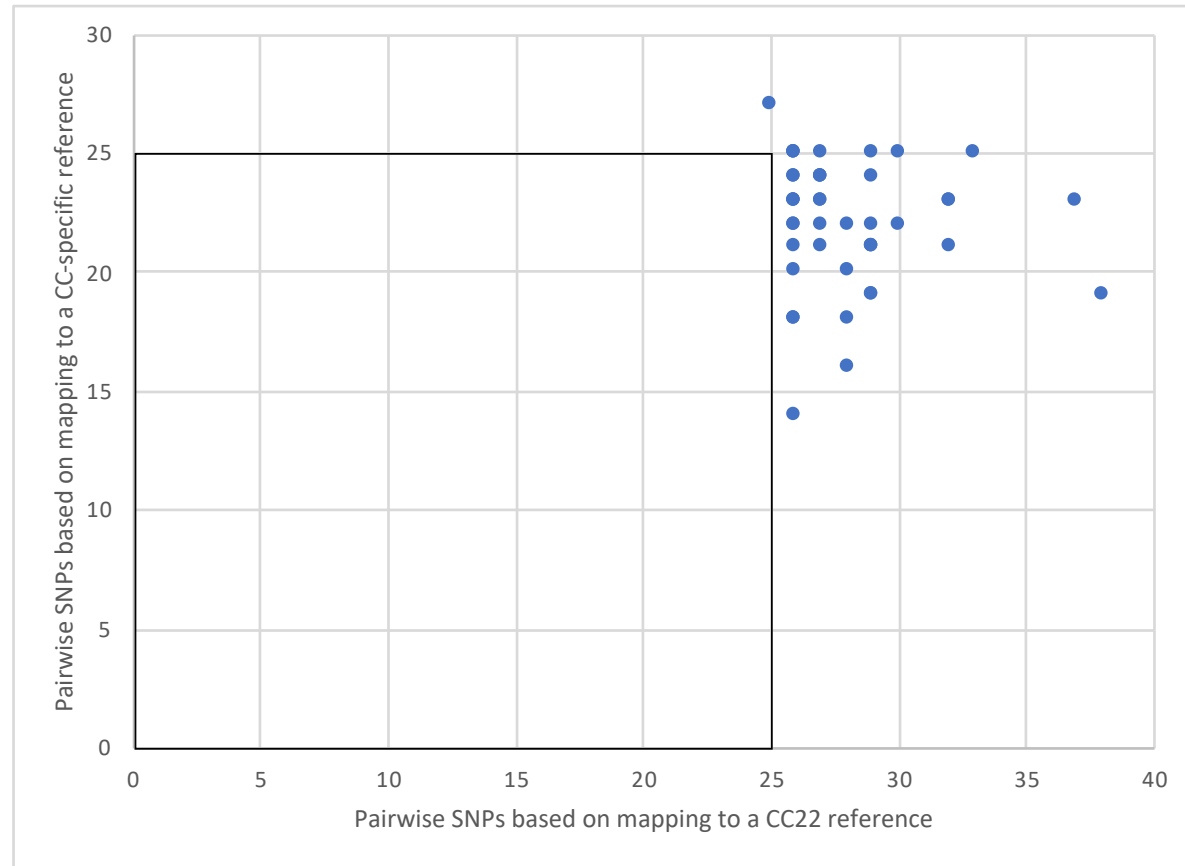

**Supplementary Figure 1.** Isolate pairs that were discordant in category assignment between CC-specific and CC22 mapping based on categories of 0-25 and 26-50 SNPs pairwise difference. The box indicates the differentiation between these two categories.

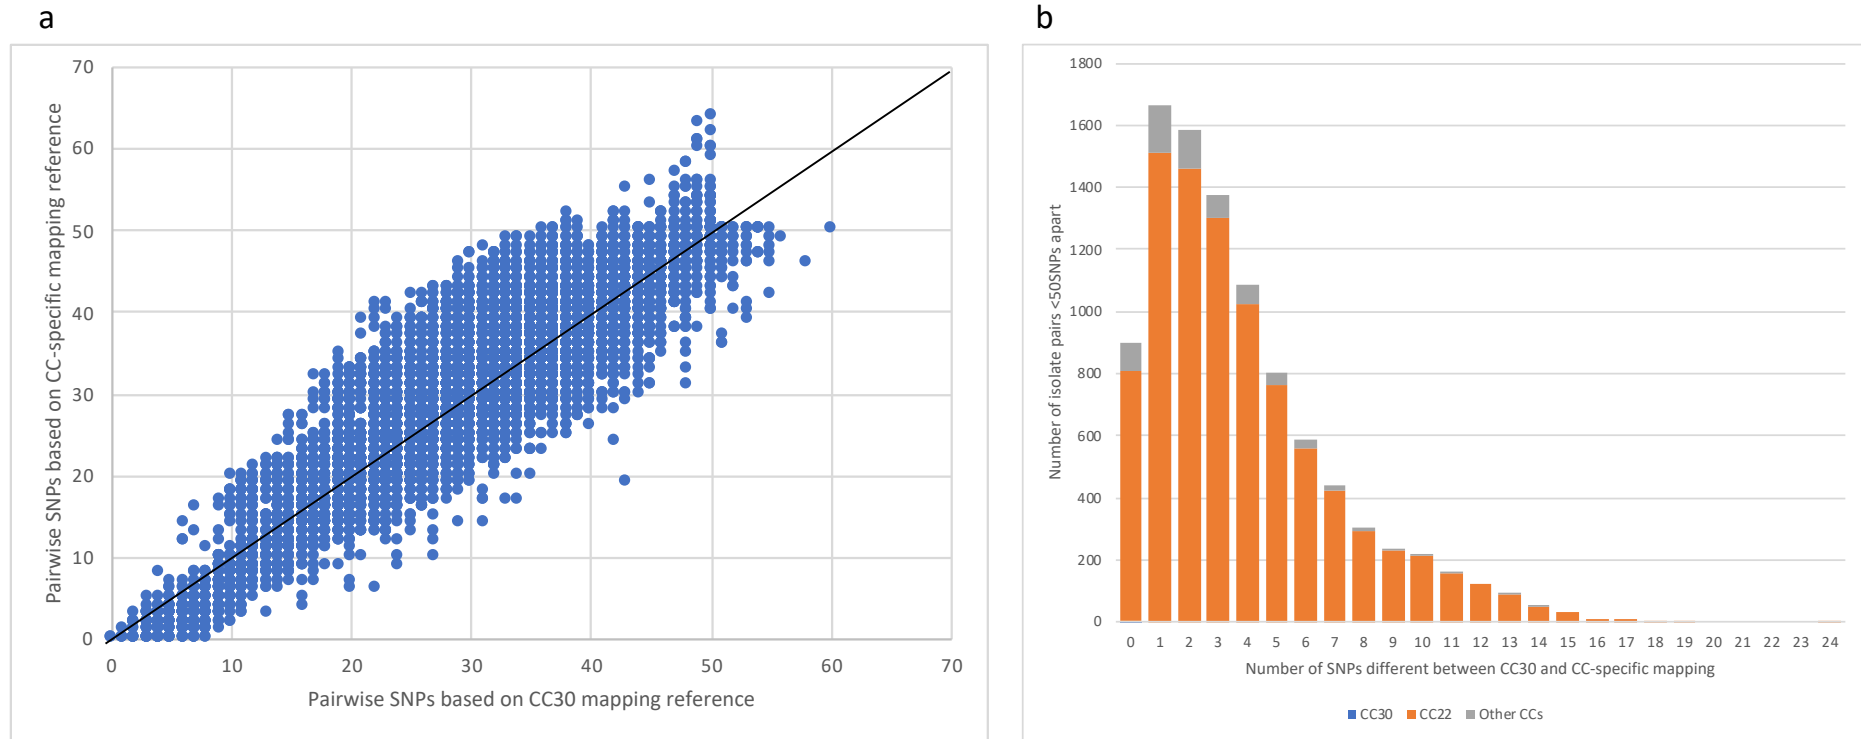

**Supplementary Figure 2. Clonal complex-specific versus single mapping reference.** (a) Graph showing the relationship between the pairwise SNP distances based on mapping to a CC30 reference and mapping to a CC-specific reference, for all isolate pairs <50 SNPs apart based on either method. Line indicates an exact match between the two methods. (b) Graph showing the number of SNPs different between CC30 and CC-specific mapping based on isolate pairs belonging to CC22 (orange), CC30 (blue) or other CC (grey) STs.

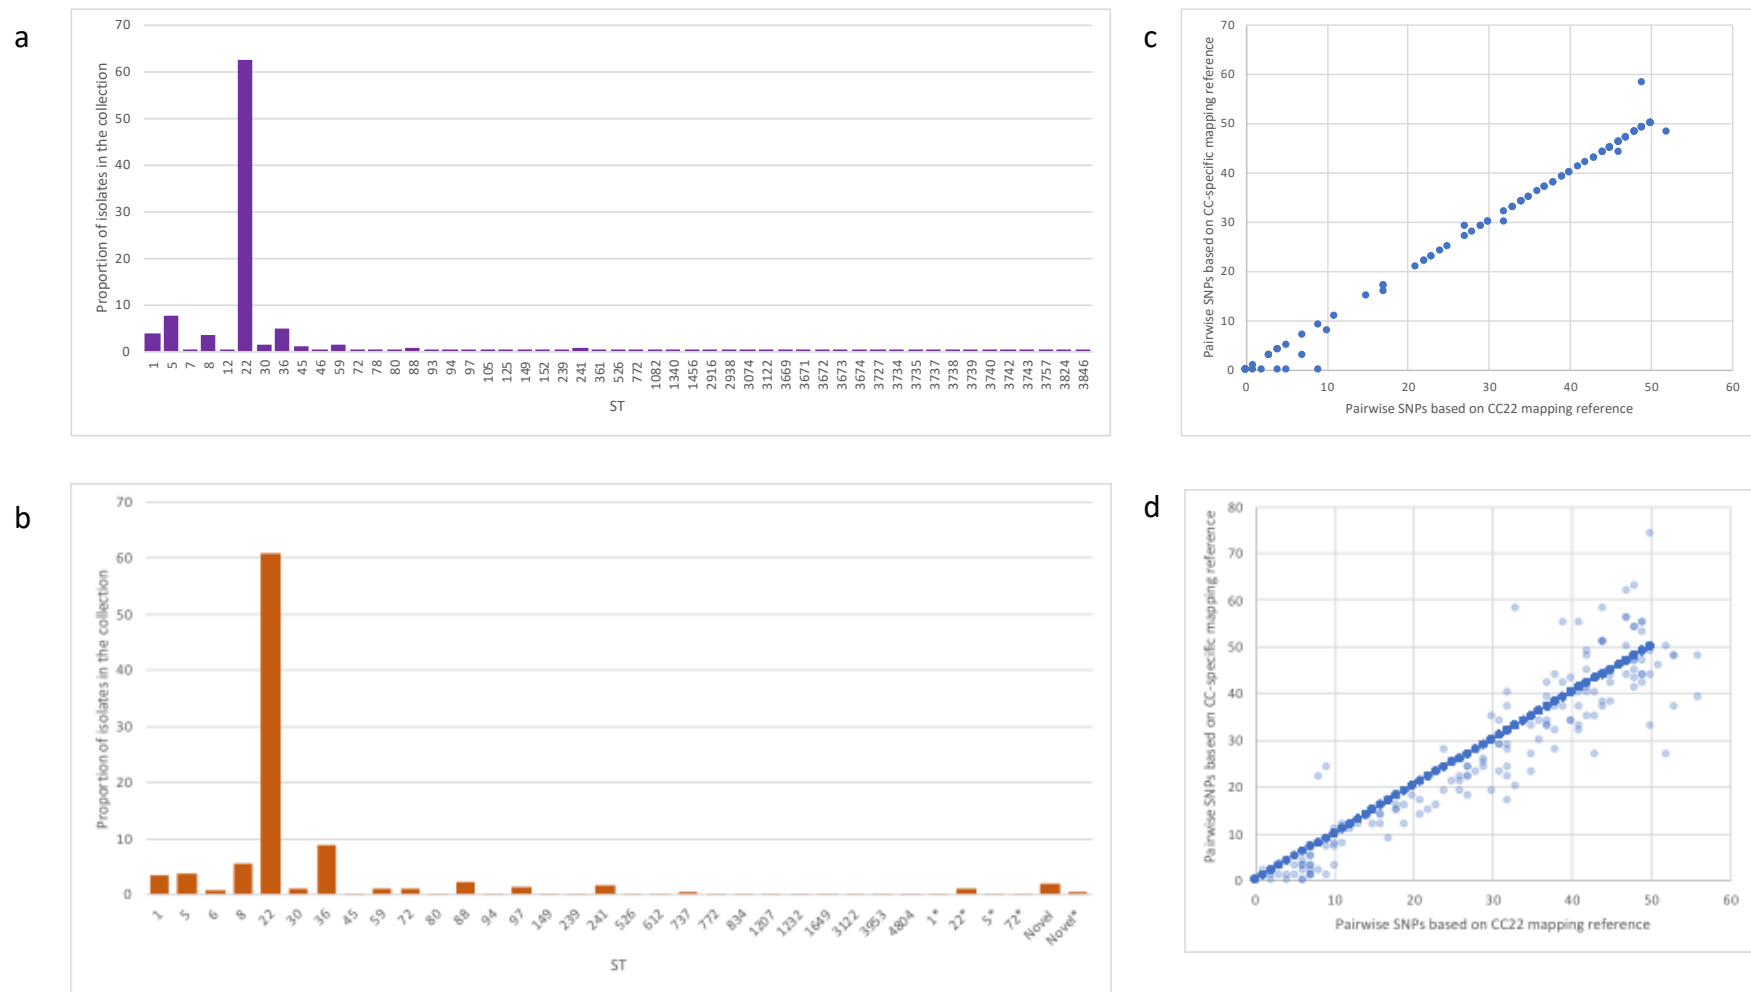

**Supplementary Figure 3.** Applicability of CC22 mapping to alternative clinical settings. (a) and (b): Graphs showing the distribution of STs in the national (a) and regional (b) collections. C and D: Graphs showing the relationship between pairwise SNP distances when mapped to a CC22 reference or a CC-specific reference for all isolate pairs <50 SNPs apart based on either method, that belonged to STs with >5 (national collection, c) or >10 (regional collection, d) isolates.

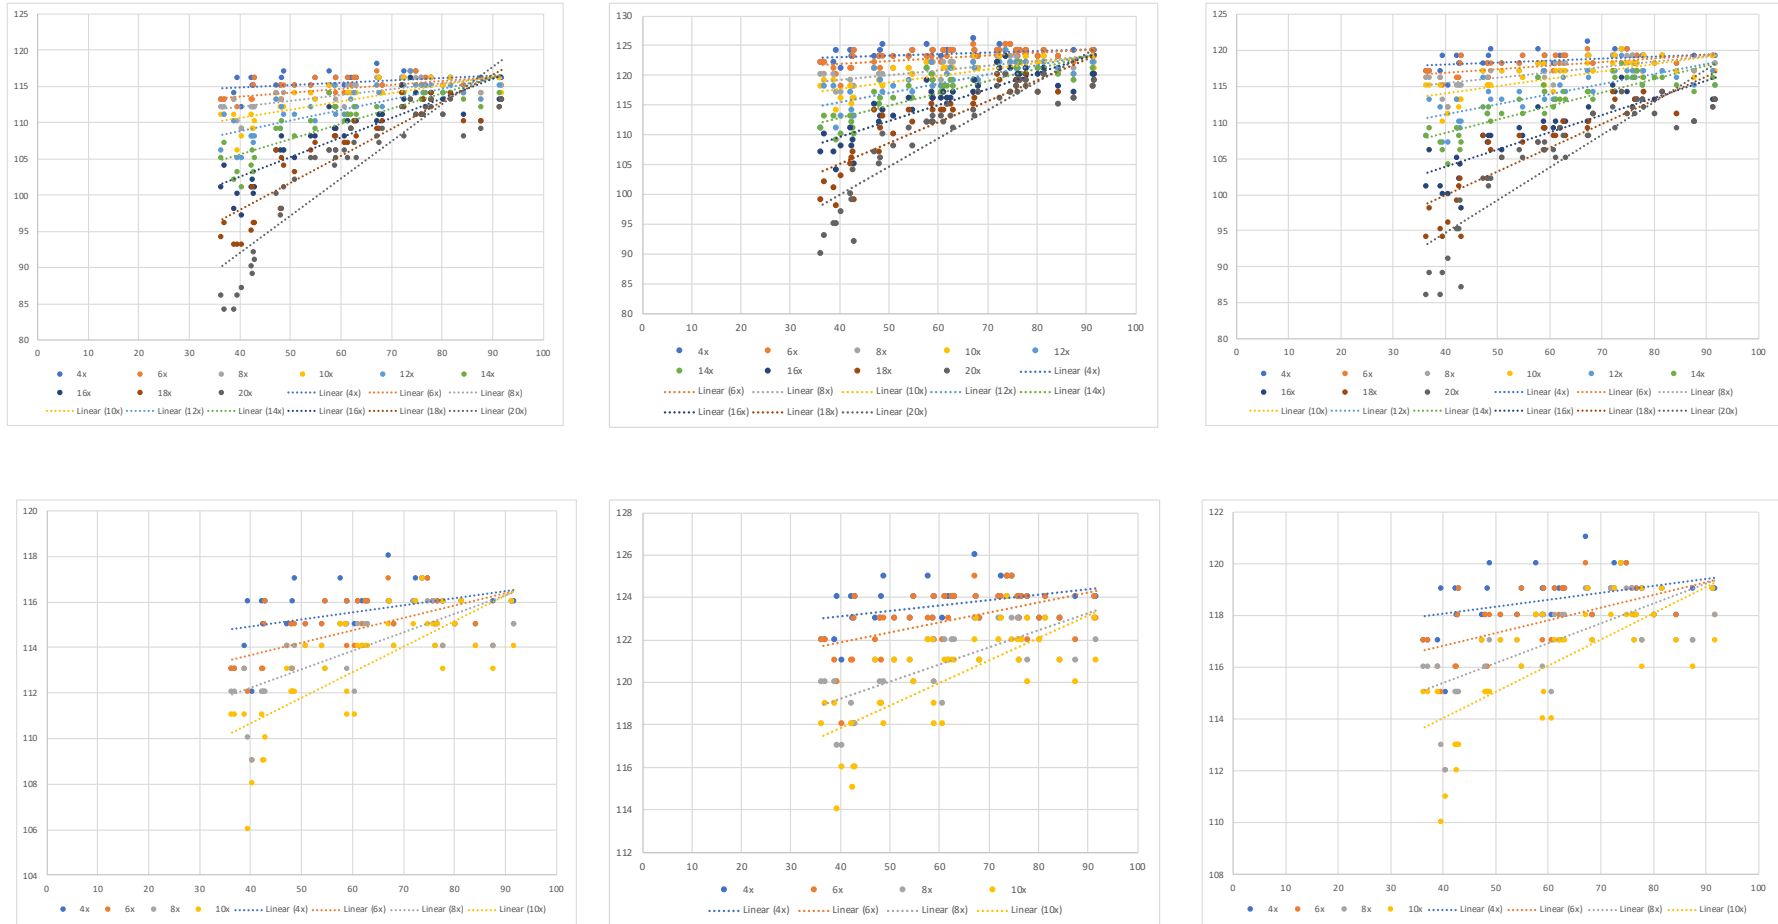

**Supplementary Figure 4.** Graphs show the number of SNPs identified between 43 sequence replicates of MPROS0386 and three study isolates (HICF0339, left hand side; HICF0500, centre; HICF0859, right hand side) using between 4x-20x (top row) or 4x-10x (bottom row) depth required to call a SNPs as present. X-axis indicates the depth of coverage across the MPROS0386 isolate when mapped to the CC22 mapping reference, y-axis shows the number of SNPs identified.



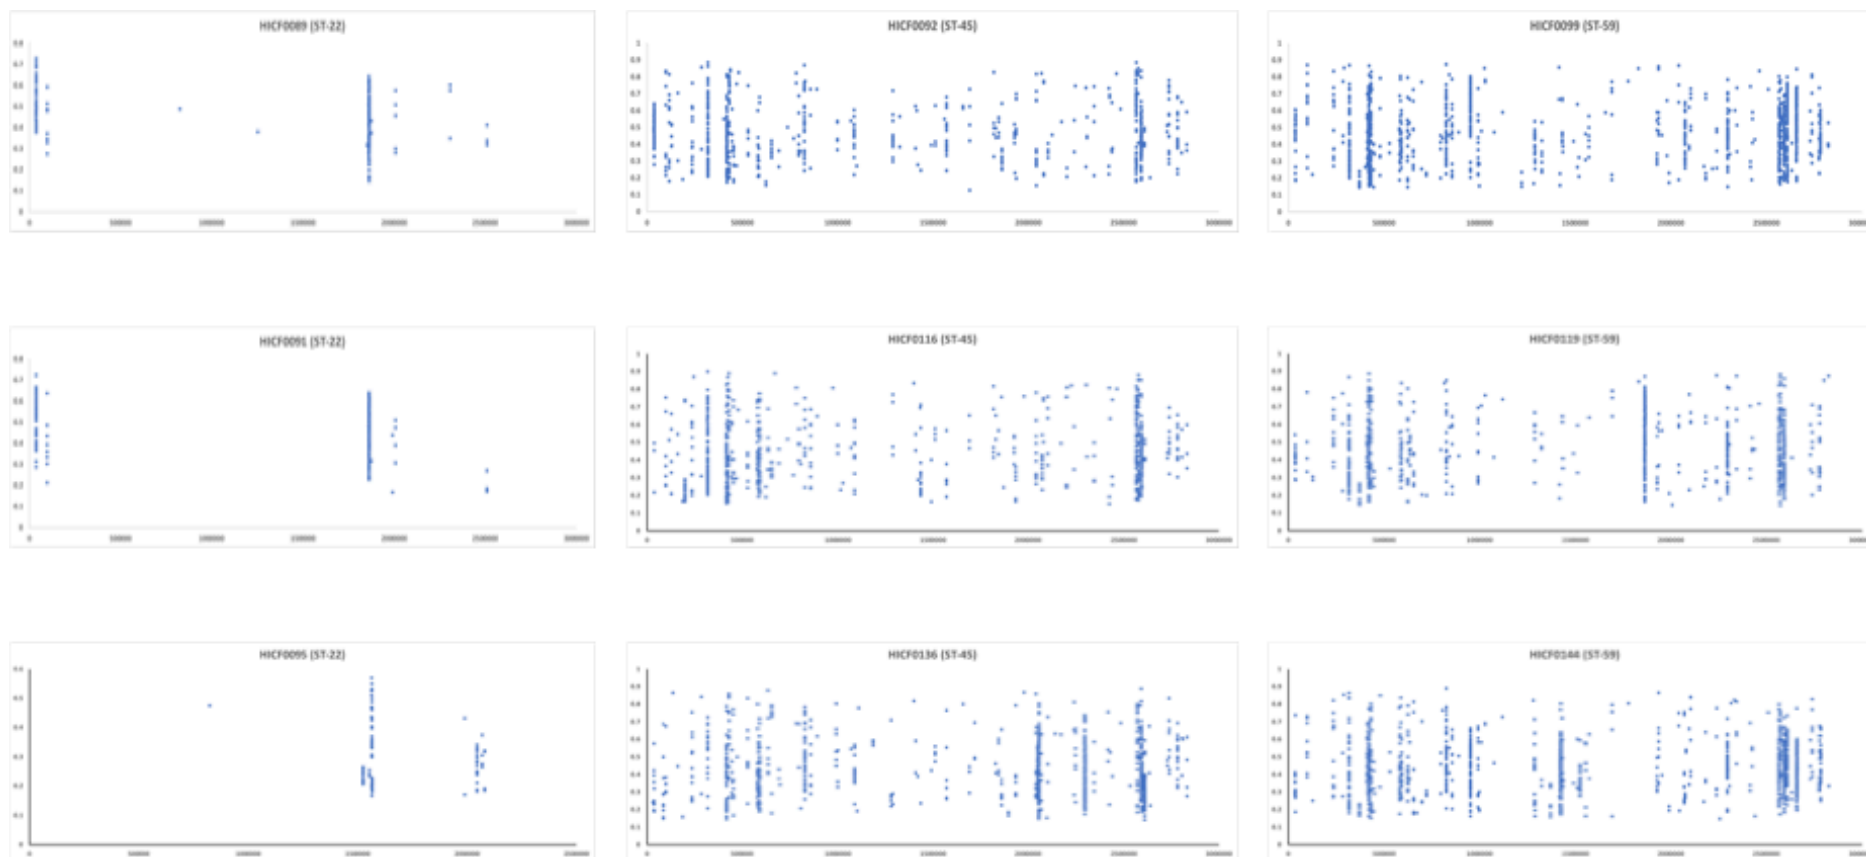

**Supplementary Figure 6.** Graphs show the location of heterozygous sites in three samples from each of the three most prevalent STs in the collection (ST22, left hand side; ST45, centre; ST59, right hand side). X-axis shows the location in the genome when mapped to the CC22 mapping reference, y-axis shows the proportion of the reads that support the SNP.

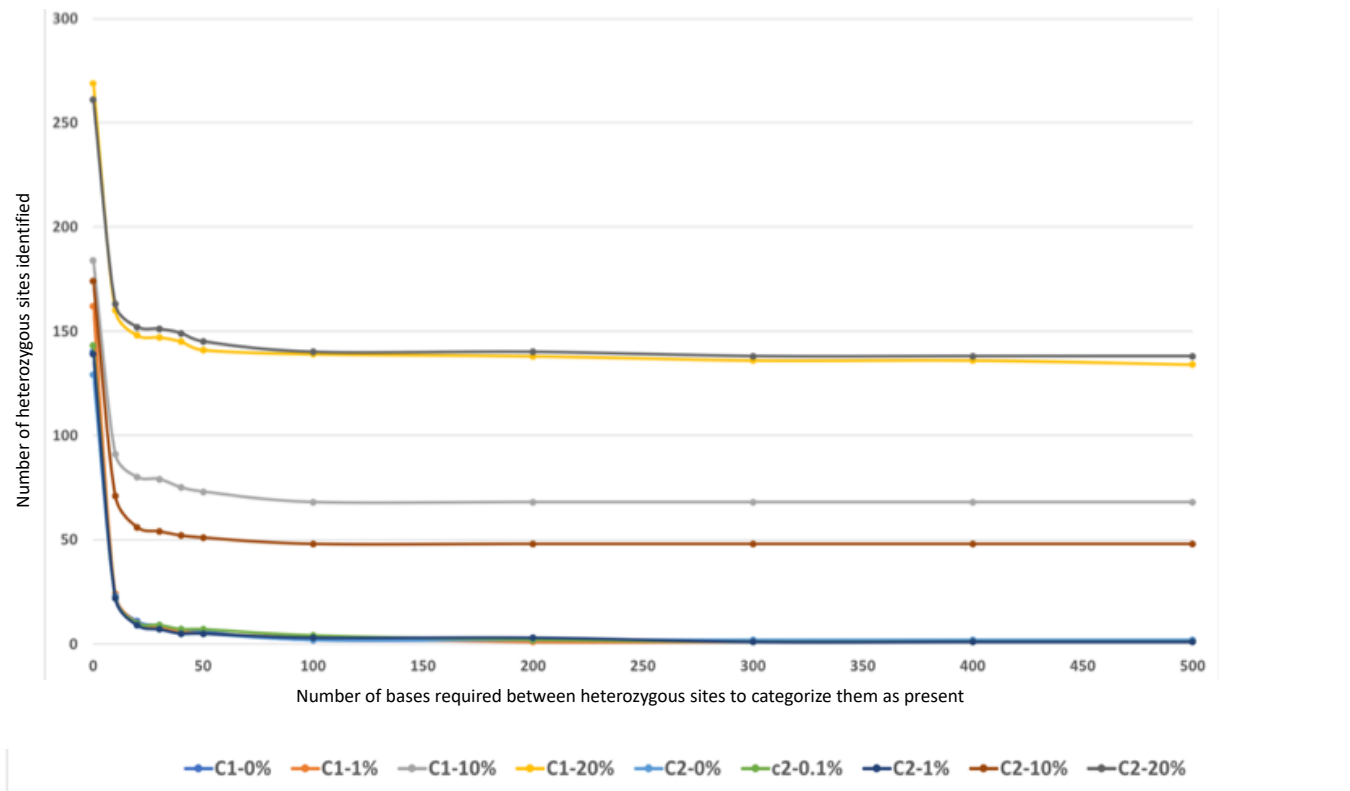

**Supplementary Figure 7.** Graph showing the number of heterozygous SNPs identified at different levels of contamination with another *S. aureus* strain. C1 = MPROS1839 contaminated with MPROS0386, C2 = MPROS2264 contaminated with MPROS0386, percentages indicate the percentage of MPROS0386 that each of the strains was contaminated with.

| Reference | Comparator strain |       | 4x           | 6x           | 8x           | 10x          | 12x          | 14x         | 16x         | 18x         | 20x         |
|-----------|-------------------|-------|--------------|--------------|--------------|--------------|--------------|-------------|-------------|-------------|-------------|
| CC22      | HO 5096 0412      | Mean  | 115          | 114          | 113          | 112          | 110          | 109         | 106         | 104         | 101         |
|           |                   | Range | 8 (111-118)  | 9 (108-116)  | 9 (108-116)  | 12 (105-116) | 14 (103-116) | 18 (98-115) | 22 (94-115) | 26 (88-113) | 38 (75-112) |
| CC30      | HICF0339          | Mean  | 112          | 110          | 107          | 106          | 105          | 103         | 101         | 99          | 96          |
|           |                   | Range | 16 (106-121) | 13 (105-117) | 13 (102-114) | 15 (99-113)  | 17 (112-96)  | 20 (93-112) | 26 (87-112) | 29 (82-110) | 35 (74-108) |
|           | HICF0500          | Mean  | 113          | 111          | 110          | 109          | 108          | 107         | 104         | 101         | 97          |
|           |                   | Range | 12 (109-120) | 13 (107-119) | 13 (105-117) | 13 (103-115) | 18 (98-115)  | 19 (96-114) | 22 (92-113) | 27 (84-110) | 31 (78-108) |
|           | HICF0859          | Mean  | 111          | 110          | 109          | 108          | 105          | 102         | 97          | 95          | 91          |
|           |                   | Range | 12 (106-117) | 13 (105-117) | 13 (103-115) | 14 (102-115) | 17 (96-112)  | 20 (92-111) | 23 (85-107) | 25 (81-105) | 31 (72-102) |

**Supplementary Table 3.** Table showing the mean and range of SNPs identified across the 43 sequence replicates of MPROS0386 based on different read depths required to call a SNP as present.
